# Supplementary material
Source: Elsevier journal article supplement (https://www.sciencedirect.com/science/article/pii/S1885585720300712)
Supplement: mmc1 [file S1885585720300712:mmc1.pdf]

## SUPPLEMENTARY DATA

**Table 1 of the supplementary data**

Schedule of EMB and echocardiograms during follow-up

| Time after OHT                                   | EMB | Echocardiogram |
|--------------------------------------------------|-----|----------------|
| 10-15 d                                          | X   | X              |
| 1 mo                                             | X   | X              |
| 2 mo                                             | X   | X              |
| 3 mo                                             | X   | X              |
| 6 mo                                             | X   | X              |
| 1 y                                              | X   | X              |
| Surveillance EMB after<br>previous ACR $\geq$ 2R | X   | X              |

ACR, acute cellular rejection; EMB, endomyocardial biopsy; OHT, orthotopic heart transplant.

**Table 2 of supplementary data**

Number of patients included by each center

| Center   | Patients included per center |
|----------|------------------------------|
| Center 1 | 26                           |
| Center 2 | 12                           |
| Center 3 | 9                            |
| Center 4 | 9                            |
| Center 5 | 13                           |
| Center 6 | 15                           |
| Center 7 | 15                           |
| Total    | 99                           |
